# Supplementary material for: Microbes can help explain the evolution of host altruism
Source: PubMed Central journal article supplement (PMC5241693; doi:10.1038/ncomms14040), 2017-01-12
Supplement: ncomms14040-s1.pdf [file ncomms14040-s1.pdf]

# Supplementary Information

## Supplementary Note 1 Further analysis of the model

In Supplementary Note 1 we further analyze our model, investigating condition (5) presented in the Methods under several additional parameter regimes, and derive the conditions that allow the fixation of the altruism-inducing microbe. We use the same parameters and model settings as in the main text, unless stated otherwise. Throughout supplementary note 1 we use  $\mu = 1 - VT$ ,  $b_m = b$ , and  $c_m = c$ .

In the Methods section we derived condition (5):

$$S1. p(1 - p)[T_\alpha - T_\beta + T_\alpha b_g - T_\beta b_g - T_\alpha c_g + T_\beta c_g + (1 - \mu)(T_\alpha b_m + T_\beta c_m - c_m) + \mu(T_\alpha b_m p - T_\beta b_m p - T_\alpha c_m p + T_\beta c_m p)] > 0$$

which determines when altruism-inducing microbes ( $\alpha$ ) can evolve, and presented results for several special cases. In this section we analyze several additional parameter regimes.

### 1.1 Case I: $\alpha$ has a lower horizontal transmission probability than $\beta$ ( $T_\alpha < T_\beta$ )

If  $T_\alpha < T_\beta$ , it follows from S1 that  $p$  would increase whenever:

$$S2. p < \frac{T_\alpha - T_\beta - c_m + T_\alpha b_g + T_\alpha b_m - T_\beta b_g - T_\alpha c_g + T_\beta c_g + T_\beta c_m + c_m \mu - T_\alpha b_m \mu - T_\beta c_m \mu}{\mu((b_m - c_m)(T_\beta - T_\alpha))}$$

We denote the right hand side of S2 by  $R$  and note that when (i)  $R \leq 0$ , S2 cannot be satisfied since  $p$  is non-negative, and thus  $p$  does not increase, meaning that altruism-inducing microbes do not evolve; (ii) if  $R \geq 1$ , S2 is always satisfied since  $p \leq 1$ , and thus  $p$  increases, meaning that altruism-inducing microbes will fixate in the population; and (iii) if  $0 < R < 1$ , S2 will be

27 satisfied for only some values of  $p$ , meaning that altruism-inducing microbes will neither fixate  
 28 nor go to extinction. In this case we reach polymorphism, which is stable, as we show below.

29

30 We first consider the regime of  $\mu \geq \frac{T_\alpha}{T_\beta}$ .

31 (i) Microbe-induced altruism will go to extinction when  $R \leq 0$ . This happens when:

32

33 S3. 
$$\frac{b_m}{c_m} \leq \frac{(T_\beta - T_\alpha)(1 + b_g - c_g)}{c_m T_\alpha (1 - \mu)} + \frac{1 - T_\beta}{T_\alpha}$$

34

35 (ii) Microbe-induced altruism reaches fixation when  $R \geq 1$ . However, for this regime of  $\mu$ ,  $R$  is  
 36 never greater than 1. To see why, note that  $R \geq 1$  if and only if:

37

38 S4. 
$$\frac{b_m}{c_m} \leq \frac{(T_\beta - T_\alpha)(1 + b_g - c_g) + c_m(1 - T_\beta) - c_m\mu(1 - T_\alpha)}{c_m(T_\alpha - \mu T_\beta)}$$

39

40 Since  $\mu \leq 1$  and  $c_g + c_m < 1$ , the numerator of the right hand side of S4 is positive:

$$(T_\beta - T_\alpha)(1 + b_g - c_g) + c_m(1 - T_\beta) - c_m\mu(1 - T_\alpha) > (T_\beta - T_\alpha)(1 + b_g - c_g) + c_m(1 - T_\beta) - c_m(1 - T_\alpha) \\ = (T_\beta - T_\alpha)(1 + b_g - c_g - c_m) > 0$$

41 Since also  $\mu > \frac{T_\alpha}{T_\beta}$ , the denominator of the right hand side of S4 is negative. Therefore, S4

42 cannot be satisfied and hence  $R$  is not greater than 1.

43 (iii) Polymorphism therefore exists when:

44

45 S5. 
$$\frac{b_m}{c_m} > \frac{(T_\beta - T_\alpha)(1 + b_g - c_g)}{c_m T_\alpha (1 - \mu)} + \frac{1 - T_\beta}{T_\alpha}$$

46

47 Next, we consider the case of  $\mu < \frac{T_\alpha}{T_\beta}$ .

48 (i) The condition under which microbe-induced altruism will go extinct ( $R \leq 0$ ), is S3 as above.

49 (ii) Microbe-induced altruism fixates ( $R \geq 1$ ), independent of its starting condition, when:

50

51 
$$S6. \frac{b_m}{c_m} \geq \frac{(T_\beta - T_\alpha)(1 + b_g - c_g) + c_m(1 - T_\beta) - c_m\mu(1 - T_\alpha)}{c_m(T_\alpha - \mu T_\beta)}$$

52

53 (iii) Combining conditions S3 and S6, we find that polymorphism exists when:

54

55 
$$S7. \frac{(T_\beta - T_\alpha)(1 + b_g - c_g)}{c_m T_\alpha (1 - \mu)} + \frac{1 - T_\beta}{T_\alpha} < \frac{b_m}{c_m} < \frac{(T_\beta - T_\alpha)(1 + b_g - c_g) + c_m(1 - T_\beta) - c_m\mu(1 - T_\alpha)}{c_m(T_\alpha - \mu T_\beta)}$$

56

57 **1.2 Case II:  $\beta$  has a lower horizontal transmission probability ( $T_\alpha > T_\beta$ )**

58

59 When  $T_\alpha > T_\beta$ ,  $\mu < \frac{T_\alpha}{T_\beta}$  is always satisfied since  $\mu \leq 1$ .

60 In analogy to section (1.1), the conditions for the spread of altruism in the case  $T_\alpha > T_\beta$  are:

61

62  $\alpha$  will go extinct for any  $0 < p < 1$ , when:

63

64 
$$S8. \frac{b_m}{c_m} \leq \frac{c_m(1 - T_\beta) - c_m\mu(1 - T_\alpha) - (T_\alpha - T_\beta)(1 + b_g - c_g)}{c_m(T_\alpha - \mu T_\beta)}$$

65

66  $\alpha$  will spread in the population for any  $0 < p < 1$ , i.e. will fixate, when:

67

68 
$$S9. \frac{b_m}{c_m} \geq \frac{1 - T_\beta}{T_\alpha} - \frac{(T_\alpha - T_\beta)(1 + b_g - c_g)}{c_m T_\alpha (1 - \mu)} \quad (\text{for } \mu < 1; \text{ and for any } b_m/c_m \text{ when } \mu = 1)$$

69

70 Combining S8 and S9, polymorphism is expected when:

71

72 
$$\frac{c_m(1 - T_\beta) - c_m\mu(1 - T_\alpha) - (T_\alpha - T_\beta)(1 + b_g - c_g)}{c_m(T_\alpha - \mu T_\beta)} < \frac{b_m}{c_m} < \frac{1 - T_\beta}{T_\alpha} - \frac{(T_\alpha - T_\beta)(1 + b_g - c_g)}{c_m T_\alpha (1 - \mu)}$$

73

74 We note that when  $T_\alpha > T_\beta$ ,  $\alpha$  can in some cases spread in the population due to its infectivity,  
 75 even for  $b_m < c_m$ . However, we do not focus on this case since it's not in the scope of the  
 76 prisoners' dilemma setting.

77

### 78 1.3 Polymorphism analysis

79 We showed above that when the horizontal transmission rates are unequal, polymorphism  
80 exists for some parameter regimes. In this sub-section, we further analyze these  
81 polymorphisms.

82 We first investigate the polymorphism in the case  $T_\alpha < T_\beta$ . As shown above, polymorphism  
83 exists when condition S5 or S7 are satisfied (depending on the regime of  $\mu$ ). In order to examine  
84 if it is a stable polymorphism we can differentiate the left side of S1 with respect to  $p$  and  
85 calculate the derivative at steady state. We denote the left hand side of inequality S1 by  $f$ . It  
86 can be seen that  $f(p) = p(1 - p) \cdot g(p)$ , for a  $g(p)$  that is linear in  $p$ . Therefore,  $f$  is a cubic  
87 function of  $p$ , and thus can have only three real roots. It is easy to see that 0 and 1 are roots of  
88  $f$ , hence there can be only one polymorphic root in the range (0,1).

89 We begin by differentiating  $g$ :

90

$$91 \quad \text{S10. } g'(p) = -\mu(T_\beta - T_\alpha)(b_m - c_m)$$

92

93 Therefore, when differentiating  $f$  we get:

94

$$95 \quad \text{S11. } f'(p) = (1 - 2p) \cdot g(p) - p(1 - p)\mu(T_\beta - T_\alpha)(b_m - c_m)$$

96

97 Polymorphism exists if there is  $0 < p^* < 1$  such that  $g(p^*) = 0$ . For such  $p^*$  we get:

98

$$99 \quad \text{S12. } f'(p^*) = -p^*(1 - p^*)\mu(T_\beta - T_\alpha)(b_m - c_m)$$

100

101 When  $T_\alpha < T_\beta$ ,  $f'(p^*)$  for such  $p^*$  is always negative. In addition, since  
102  $0 < p^*, \mu, T_\alpha, T_\beta, b_m, c_m < 1$ , we get that  $0 < p^*(1 - p^*) < \frac{1}{4}$  and  $0 < (b_m - c_m), (T_\beta - T_\alpha) <$   
103  $1$  and therefore we can conclude that  $f'(p^*) > -\frac{1}{4}$ . Thus we see that when  $T_\alpha < T_\beta$  the  
104 polymorphic equilibrium is stable whenever it exists.

105 Using an analogous analysis, we find that for  $T_\alpha > T_\beta$  the polymorphism is unstable, and  
106 therefore any perturbation from the steady state will lead to fixation or extinction.

107

108 Supplementary Figure 1 examines the effect of the various parameters on the range of  
109 polymorphism.

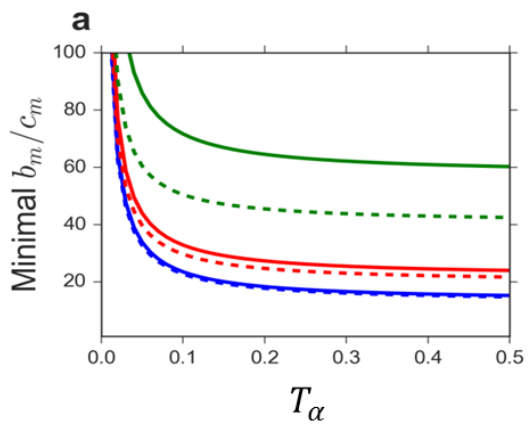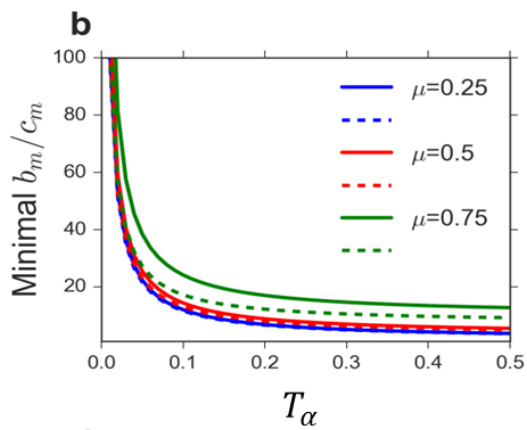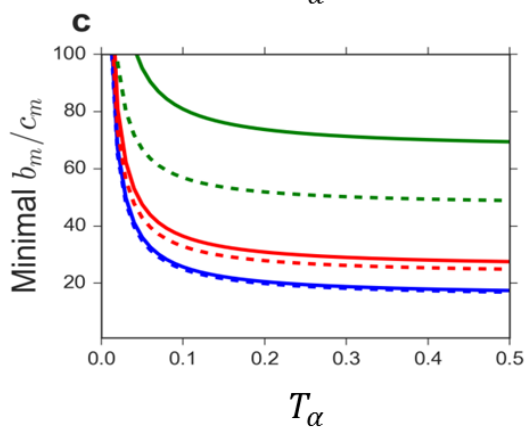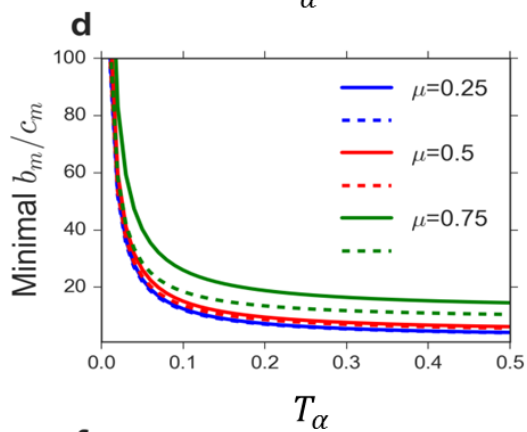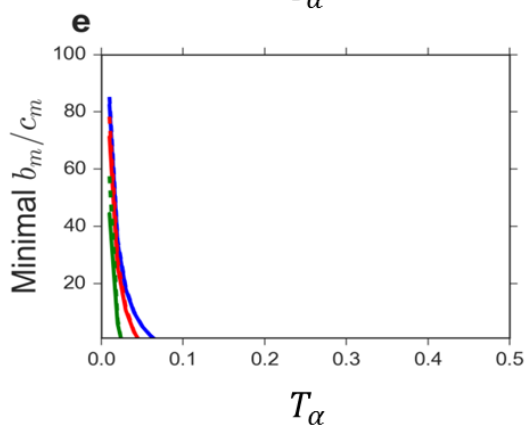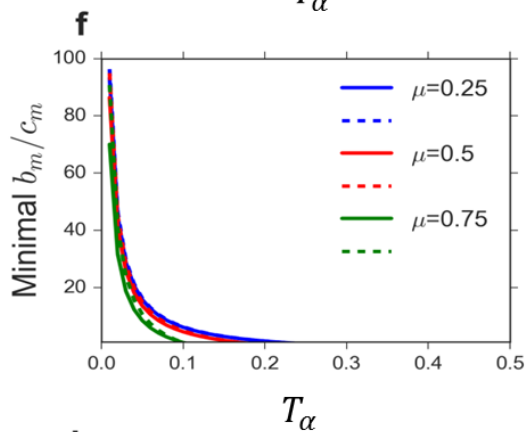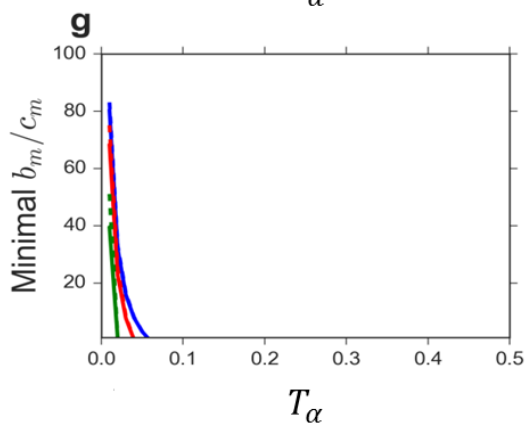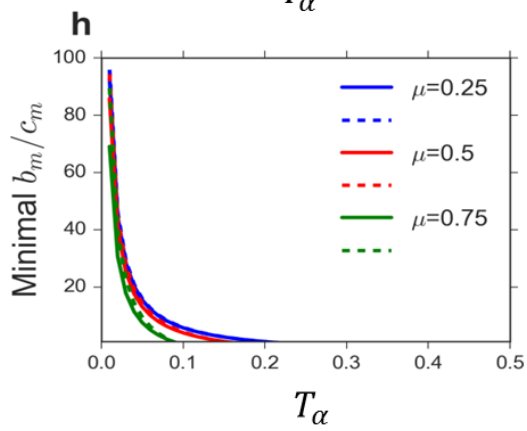

111 **Supplementary Figure 1: The effect of  $\mu$  on the  $b_m/c_m$  thresholds and polymorphism range.** We plot the upper  
112 threshold (solid line; for  $b_m/c_m$  above this line altruism fixates) and the lower threshold (dashed line; for  $b_m/c_m$   
113 beneath this line altruism goes extinct) for the case of  $T_\beta = 1.1T_\alpha$  (figures **a, b, c, d**) and  $T_\beta = 0.9T_\alpha$  (figures **e, f, g,**  
114 **h**). We examined several parameters of cost and benefit:  $c_g = 0.01, b_g = 0.05$  (figures **a, b, e, f**),  $c_g = 0.05, b_g =$   
115  $0.25$  (figures **c, d, g, h**),  $c_m = 0.01$  (figures **a, c, e, g**) and  $c_m = 0.05$  (figures **b, d, f, h**). It can be seen that the gap  
116 between the thresholds (which is where polymorphism exists) becomes significant only for high  $\mu$  and low  $c_m$ . It is  
117 also shown that when  $T_\alpha < T_\beta$  (figures **a, b, c, d**),  $b_m/c_m$  needed for fixation of  $\alpha$  increases with  $\mu$ , but when  
118  $T_\alpha > T_\beta$  (figures **e, f, g, h**),  $b_m/c_m$  needed for fixation of  $\alpha$  decreases with  $\mu$ .

119

#### 120 **1.4 The effect of genetic background of altruistic behavior among the hosts**

121 We consider the effect of host genes for altruistic behavior ( $c_g, b_g > 0$ ) in the case of perfect  
122 vertical transmission ( $\mu = 0$ ). Inequality (8), derived in the Methods, describes the condition  
123 for the spread of microbe-induced altruism in the presence of genetic background for altruism:

124

$$125 \quad S13. T_\alpha b_m > c_m(1 - T_\beta) + (1 + b_g - c_g)(T_\beta - T_\alpha)$$

126

127 Based on S13, Supplementary Figure 2 shows the effect of a fixed genetic background of  
128 altruism among the hosts on the fixation of the altruism-inducing microbes.

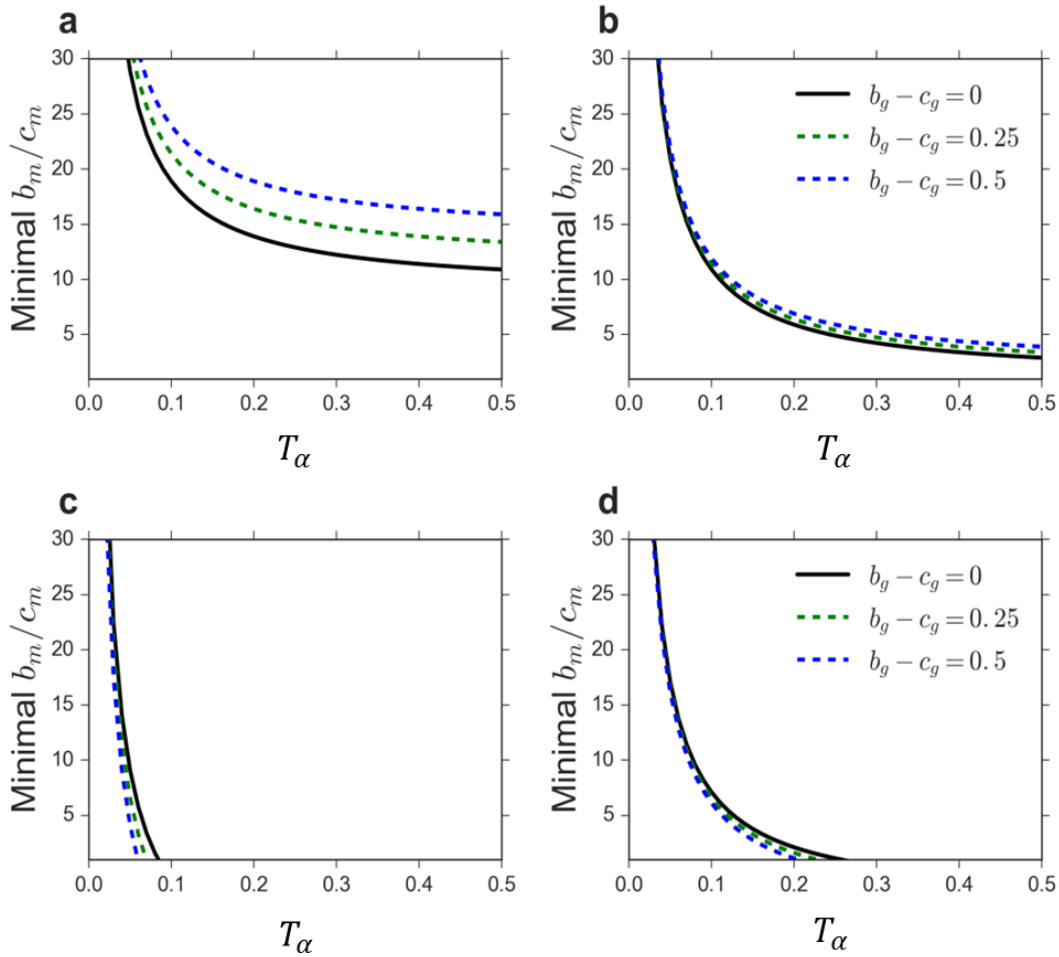

129

130 **Supplementary Figure 2: The effect of genetic altruistic background on the  $b_m/c_m$  threshold needed for fixation**

131 **of  $\alpha$ .** We plot the  $b_m/c_m$  threshold above which altruism spreads for various  $b_g - c_g$  values, in the case of perfect

132 vertical transmission ( $\mu = 0$ ). We show results for  $T_\beta = 1.1T_\alpha$  (figures **a, b**),  $T_\beta = 0.9T_\alpha$  (figures **c, d**),  $c_m = 0.01$

133 (figures **a, c**) and  $c_m = 0.05$  (figures **b, d**).

134

135

### 136 **1.5 Rate of $\alpha$ 's spread as a function of vertical transmission**

137 In this section we analyze the rate of change in the proportion of microbe  $\alpha$  in the population,

138 for the case of no genetic background of altruistic behavior in the population ( $b_g = 0, c_g = 0$ )

139 and equal horizontal transmission probability ( $T_\alpha = T_\beta = T$ ). Under these assumptions,

140 equality (4) from the Methods section becomes:

141



142 
$$S14. p' = \frac{1}{\bar{\omega}} [p^2(1 + b_m - c_m)(1 - \mu q) + pq(1 - T)(1 - c_m)(1 - \mu q)$$

143 
$$+ pqT(1 + b_m)(1 - \mu q) + pqT(1 - c_m)\mu p + pq(1 - T)(1 + b_m)\mu p + q^2\mu p]$$

144

145 and  $\bar{\omega} = 1 + p(b_m - c_m)$ . We define  $\Delta p = p' - p$  and we derive  $\Delta p$  with respect to  $\mu$ .

146

147 
$$S15. \frac{\partial \Delta p}{\partial \mu} = \frac{1}{\bar{\omega}} (-p^2q(1 + b_m - c_m) - pq^2(1 - T)(1 - c_m) - pq^2T(1 + b_m) + p^2qT(1 -$$

148 
$$c_m) + p^2q(1 - T)(1 + b_m) + q^2p)$$

149

150 When  $\frac{\partial \Delta p}{\partial \mu} < 0$ , the rate of change in the frequency of hosts carrying  $\alpha$  decreases as  $\mu$  increases.

151 After simplifying S15 we find that  $\frac{\partial \Delta p}{\partial \mu} < 0$  when:

152

153 
$$S16. p(p - 1)(Tb_m - c_m + Tc_m) < 0$$

154 and for  $0 < p < 1$  we get:

155

156 
$$S17. \frac{b_m}{c_m} > \frac{1-T}{T}$$

157

158 equivalent to condition (1) in the main text when horizontal transmission is equal. That is,

159 whenever the altruism-inducing microbe ( $\alpha$ ) can evolve (condition (1)), it follows from S17 that

160 its rate of spread increases with the probability of vertical transmission,  $V_T = 1 - \mu$ .

161

162

163 **Supplementary Note 2 Model analysis based on the fitness of the**

164 **two microbes**

165 In the Methods section we derive the condition for fixation of altruism-inducing microbes in a

166 population by analyzing the recursion equation describing the proportion of altruists in the next

167 generation. In this section we show a different approach for the derivation, through analysis of

168 the inclusive fitness of both microbes. Since microbes are transferred vertically, their fitness is  
 169 affected by their host fitness. In addition, the microbes' fitness is affected by their horizontal  
 170 transmission probability. We focus on the special case of perfect vertical transmission ( $VT = 1$ )  
 171 and no genetic background of altruistic behavior ( $b_g = c_g = 0$ ), and denote  $b_m = b$ , and  
 172  $c_m = c$ . We derive the same condition (1) presented in the main text.

173  
 174 In order to consider the fitness of the altruism-inducing microbes, we consider all possible  
 175 interactions involving a host carrying  $\alpha$  (termed "altruist" below). We assume that the microbes  
 176 are present only within hosts, and the fitness of a microbe is the expected number of hosts in  
 177 the next generation, who are infected by the offspring of this microbe. The baseline fitness is  
 178 set to 1 for both microbes:

179 First, the altruist may interact with another altruist, with probability  $p$ , and in such an  
 180 interaction the fitness of each altruist is:  $1 + b_m - c_m$ .

181 Second, the altruist may interact with a "selfish individual" (host carrying  $\beta$ ), with probability  $q$ .  
 182 Then, the probability of no horizontal transmission during interaction is  $(1 - T_\alpha)(1 - T_\beta)$ , and  
 183 in that case the fitness of the altruist is:  $1 - c_m$ ; The probability that only the altruist infects its  
 184 partner is  $T_\alpha(1 - T_\beta)$  and in this case we now have two altruists with fitnesses  $1 + b_m$  and  $1 -$   
 185  $c_m$ ; The probability that only the "selfish individual" infects its partner is  $T_\beta(1 - T_\alpha)$ , and in this  
 186 case we now have two "selfish individuals"; Finally, the probability that both individuals infect  
 187 each other is  $T_\beta T_\alpha$ , and in this case we now have an altruist with fitness:  $1 + b_m$ .

188  
 189 Thus, the fitness of an altruism inducing microbe ( $\alpha$ ) is:

190  
 191 
$$S18. \omega_\alpha = p(1 + b_m - c_m) + q \left( (1 - T_\alpha)(1 - T_\beta)(1 - c_m) + T_\alpha(1 - T_\beta)(2 + b_m - \right.$$
  
 192 
$$\left. c_m) + T_\alpha T_\beta(1 + b_m) \right)$$

193  
 194 Similarly, we can calculate the fitness of microbe  $\beta$ :

195

196 
$$s_{19}. \omega_{\beta} = q + p \left( (1 - T_{\alpha})(1 - T_{\beta})(1 + b_m) + T_{\beta}(1 - T_{\alpha})(2 + b_m - c_m) + T_{\alpha}T_{\beta}(1 - c_m) \right)$$

197

198 Altruism spreads when  $\omega_{\alpha} > \omega_{\beta}$ . That is, when:

199

$$T_{\alpha}b_m > c_m(1 - T_{\beta}) + (T_{\beta} - T_{\alpha})$$

200

201 This is the same condition that was derived in the Methods (9) and presented in the Results as  
202 condition (1).

203

### 204 **Supplementary Note 3      Microbe-induced altruism in the presence** 205 **of host polymorphism for altruism**

206 Up until now we assumed that the host population is homogenous in the locus that determines  
207 altruistic behavior. In Supplementary Note 3 we consider a population that is polymorphic with  
208 respect to both altruism-inducing host genes and altruism-inducing microbes. We show that  
209 altruism encoded in the host genes does not evolve in this model irrespective of the presence  
210 of microbe  $\alpha$ , while microbe-induced altruism can evolve, irrespective of the presence of  
211 altruism encoded in the host's genes. The results are therefore identical to the ones obtained  
212 for microbe-induced altruism alone.

213 Individuals with allele  $A$  act altruistically: when interacting with another individual they pay a  
214 fitness cost  $c_g$ , while the receiver gets a fitness benefit  $b_g$ . Individuals with allele  $E$  do not  
215 behave altruistically.

216 In addition, each individual in the population carries one of two microbe types. Microbes of  
217 type  $\alpha$  manipulate their host to act altruistically: A host carrying  $\alpha$  pays a fitness cost  $c_m$  during  
218 interaction, while its partner gets a fitness benefit  $b_m$ . Microbes of type  $\beta$  do not affect their  
219 host's behavior.

220 We assume independent and additive effects of the microbes and the host's genetics on the  
221 host behavior. For example, if an individual has an altruistic allele, and it also carries the

222 altruism-inducing microbe (type  $A\alpha$ ), it pays a fitness cost of  $c_g + c_m$  during interactions, while  
 223 its partner receives a fitness benefit of  $b_g + b_m$ .

224

225 In this setup we now have four types of individuals:

226  $A\alpha$  – carry both an allele for altruism ( $b_g, c_g$ ) and altruism-inducing microbes ( $b_m, c_m$ ).

227  $E\alpha$  – do not carry an allele for altruism, but carry altruism-inducing microbes ( $b_m, c_m$ ).

228  $A\beta$  – carry an allele for altruism ( $b_g, c_g$ ), but not altruism-inducing microbes.

229  $E\beta$  – carry neither an allele for altruism, nor altruism-inducing microbe.

230

231 Payoff matrix:

|           | $A\alpha$               | $E\alpha$          | $A\beta$          | $E\beta$     |
|-----------|-------------------------|--------------------|-------------------|--------------|
| $A\alpha$ | $b_g - c_g + b_m - c_m$ | $-c_g + b_m - c_m$ | $b_g - c_g - c_m$ | $-c_g - c_m$ |
| $E\alpha$ | $b_g + b_m - c_m$       | $b_m - c_m$        | $b_g - c_m$       | $-c_m$       |
| $A\beta$  | $b_g - c_g + b_m$       | $-c_g + b_m$       | $b_g - c_g$       | $-c_g$       |
| $E\beta$  | $b_g + b_m$             | $b_m$              | $b_g$             | 0            |

232

233

234 We denote by  $p_A, p_E, q_A, q_E$  the proportions of  $A\alpha, E\alpha, A\beta, E\beta$  in the population, respectively,  
 235 and calculate the mean fitness of the population. Similar to the derivation of the mean fitness  
 236 in the Methods (eq. (3)), we derive the mean fitness in this generalized case:

237

238 
$$S20. \bar{\omega} = 1 + p_A(b_g + b_m - c_g - c_m) + p_E(b_m - c_m) + q_A(b_g - c_g)$$

239

240 Now we can derive the proportion of each type in the next generation:

241

242 
$$S21. p_A' = \frac{1}{\bar{\omega}} \cdot \left( p_A^2(1 + b_g - c_g + b_m - c_m) + p_A p_E(1 - c_g + b_m - c_m) + p_A q_A(1 - T_\beta)(1 + \right.$$

243 
$$\left. b_g - c_g - c_m) + p_A q_E(1 - T_\beta)(1 - c_g - c_m) + p_A q_A T_\alpha(1 + b_g - c_g + b_m) + p_E q_A T_\alpha(1 - c_g + b_m) \right)$$

244

245 
$$S22. p_E' = \frac{1}{\bar{\omega}} \cdot \left( p_E p_A (1 + b_g + b_m - c_m) + p_E^2 (1 + b_m - c_m) + p_E q_A (1 - T_\beta) (1 + b_g - \right.$$

246 
$$\left. c_m) + p_E q_E (1 - T_\beta) (1 - c_m) + p_E q_E T_\alpha (1 + b_m) + p_A q_E T_\alpha (1 + b_g + b_m) \right)$$

247

248 
$$S23. q_A' = \frac{1}{\bar{\omega}} \cdot \left( q_A p_A (1 - T_\alpha) (1 + b_g - c_g + b_m) + q_A p_E (1 - T_\alpha) (1 - c_g + b_m) + \right.$$

249 
$$\left. q_A^2 (1 + b_g - c_g) + q_A q_E (1 - c_g) + q_A p_A T_\beta (1 + b_g - c_g - c_m) + q_E p_A T_\beta (1 - c_g - c_m) \right)$$

250

251 
$$S24. q_E' = 1 - p_A' - p_E' - q_A'$$

252

253 Numerical analysis of these equations shows that regardless of the initial proportions in the  
 254 population and the  $b_g, c_g$  values, the only types that fixate in the population are  
 255  $E\alpha$  and  $E\beta$ , namely, the host allele for altruism always goes extinct. The results are identical to  
 256 the results of the main model without the host alleles  $A$  and  $E$ :  $E\alpha$  goes to fixation in the exact  
 257 same parameters that  $\alpha$  alone goes to fixation according to inequality (1), presented in the  
 258 main text (Fig. 2, compare with Supplementary Figure 3).

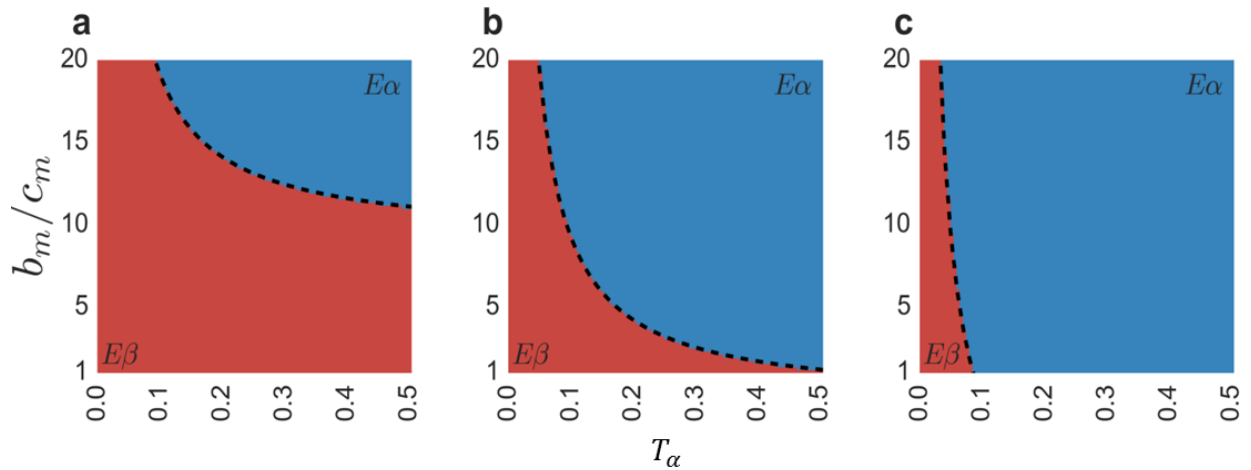

259

260 **Supplementary Figure 3: Fixation of the microbes is independent of the host alleles.** A phase diagram of the type  
 261 that reaches fixation is plotted as a function of  $\alpha$ 's horizontal transmission probability and  $b_m/c_m$  ratio, for  
 262  $c_m = 0.01$  and several horizontal transmission ratios:  $T_\beta = 1.1T_\alpha$  (a),  $T_\beta = T_\alpha$  (b) and  $T_\beta = 0.9T_\alpha$  (c). Blue areas  
 263 represent parameter regimes where  $E\alpha$  fixates, while red areas represent parameters where  $E\beta$  fixates. The  
 264 results are based on numerical analysis of equations S20-S24. The dashed lines show the critical value derived from  
 265 condition (1) in the main text (also presented in Fig. 2a). The threshold for the fixation of  $\alpha$ , derived from the

266 numerical analysis, is identical to inequality (9) in the methods. The same results were obtained for a wide range of  
267 initial proportions of the different individual types, and various  $b_g, c_g$  values.

268

269

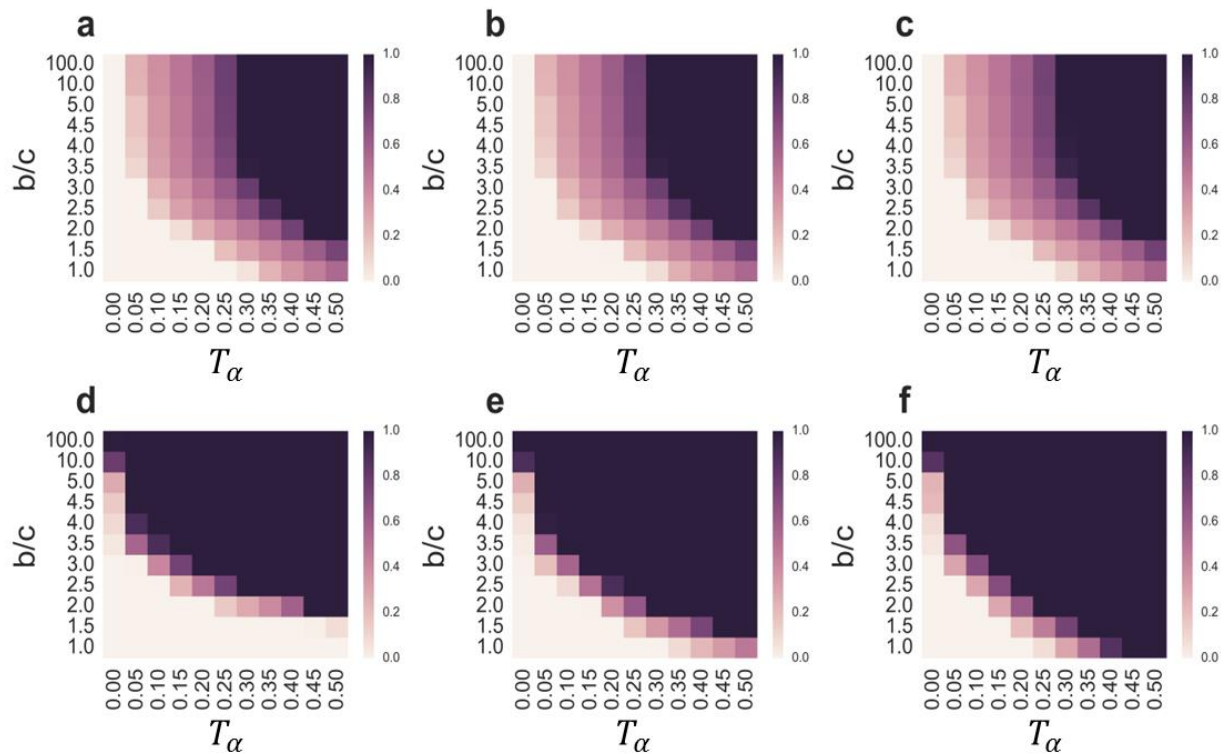

271

272 **Supplementary Figure 4: Microbe-induced altruism can flourish in a spatial Prisoners' Dilemma scenario, even**273 **when it has horizontal transmission disadvantage.** Hosts carrying either microbes of type  $\alpha$  or  $\beta$  are placed on a274  $100 \times 100$  lattice grid. Hosts carrying microbe  $\alpha$  initially inhabit 5% of the sites, chosen in random positions in the275 lattice. The final proportion of hosts that carry microbe  $\alpha$  is plotted (color coded) as a function of horizontal276 transmission probability  $T_\alpha = T_\beta = T$  and  $b/c$  values, for  $K = 1$  (**a, b, c**),  $K = 8$  (**d, e, f**),  $T_\beta = 1.1T_\alpha$  (**a, d**),  $T_\beta = T_\alpha$ 277 (**b, e**) and  $T_\beta = 0.9T_\alpha$  (**c, f**). Each cell in the plots represents the mean of at least 100 runs. For  $K = 1$  (a single278 interaction per individual per generation) we find that a mild shift from  $T_\alpha = T_\beta$  into the cases of  $T_\beta = 0.9 \cdot T_\alpha$ 279 (horizontal transmission advantage to  $\alpha$ ) and  $T_\beta = 1.1 \cdot T_\alpha$  (horizontal transmission advantage to  $\beta$ ) has a very280 minor effect on the results. When we increase the number of interactions to  $K = 8$ , the same change in horizontal

281 transmission ratio has a somewhat larger effect, as the same rate of horizontal transmission is applied 8 times in

282 each generation. As can be seen, even when  $\alpha$  has a horizontal transmission disadvantage, it can still reach stable283 polymorphism or fixation (figures **a, d**).

284

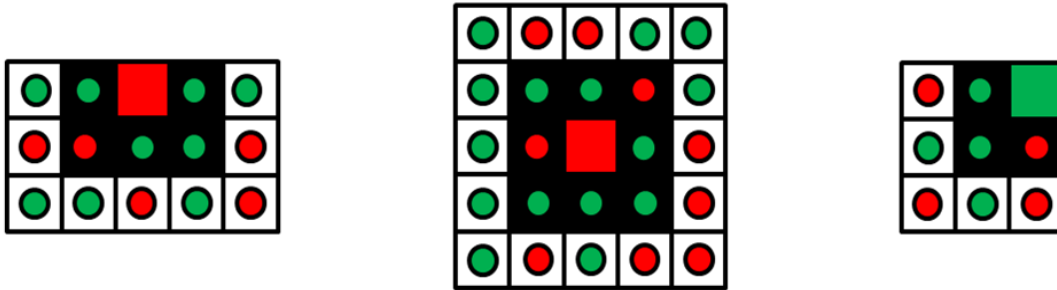

285  
286  
287  
288  
289  
290

**Supplementary Figure 5: Individuals can interact only with their immediate neighbors.** Example of interactions: the focal individual (square) can interact only with its immediate neighbors (black background). There are usually eight neighbors, unless the focal individual is close to one of the grid edges.

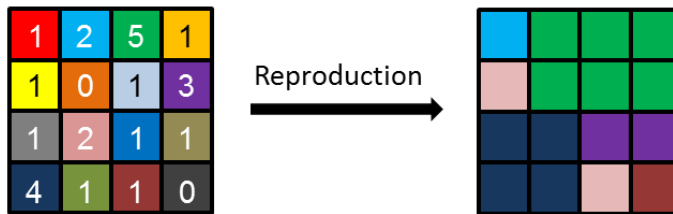

291  
292  
293  
294  
295  
296

**Supplementary Figure 6: Example of the reproduction procedure in the simulations.** Reproduction was modeled after Nowak and May (1992). A new lattice grid of the same size is formed. Every site in the new lattice is inhabited by a replicate of the fittest host from the same location, and its immediate neighborhood, in the original lattice. If there are multiple hosts with the same maximal fitness in the neighborhood, the parent is chosen at random from the fittest hosts.
